# Supplementary material for: Reactive Oxygen Species Generated by NADPH Oxidases Promote Radicle Protrusion and Root Elongation during Rice Seed Germination
Source: PubMed Central journal article supplement (PMC5297744; doi:10.3390/ijms18010110), 2017-01-13
Supplement: ijms-18-00110-s001.pdf [file ijms-18-00110-s001.pdf]

# Supplementary Materials: Reactive Oxygen Species Generated by NADPH Oxidases Promote Radicle Protrusion and Root Elongation during Rice Seed Germination

Wen-Yan Li, Bing-Xian Chen, Zhong-Jian Chen, Yin-Tao Gao, Zhuang Chen and Jun Liu

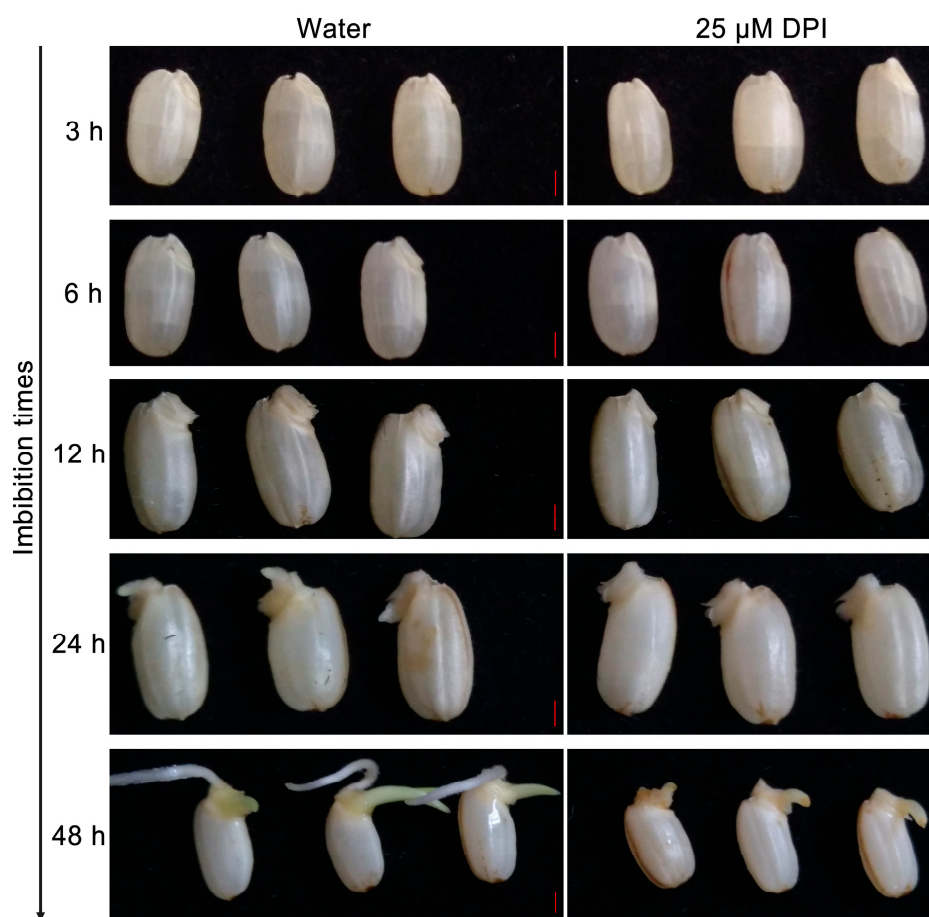

**Figure S1.** Germination morphologies of rice seeds incubated in water or with 25  $\mu\text{M}$  DPI at different time points. Scar bar, 1000  $\mu\text{m}$ .

**Table S1.** The gene-specific primers used for qRT-PCR in this study.

| Gene Name         | Primer Sequences                                                              | Amplicon Length | Span Introns/UTRs & |
|-------------------|-------------------------------------------------------------------------------|-----------------|---------------------|
| <i>OsNOX1</i>     | Forward: 5'-GGCTTCAATGCCTTCTGGT-3'<br>Reverse: 5'-ATGGCTCCTAAACAACCGA-3'      | 180 bp          | Intron 6            |
| <i>OsNOX2</i>     | Forward: 5'-ATCCGCAAATAAGCACCTCT-3'<br>Reverse: 5'-CAGTAGCCCATCACATCAAAGAC-3' | 155 bp          | /                   |
| <i>OsNOX3</i>     | Forward: 5'-TCAAGGCAGCGATTTACCC-3'<br>Reverse: 5'-CTCGCAAGCCTTCCCAA-3'        | 233 bp          | Introns 6, 7, 8     |
| <i>OsNOX4</i>     | Forward: 5'-CACAAGGTTATCGCACTGACG-3'<br>Reverse: 5'-AGCGATGAGTATGTTGGTTGA-3'  | 158 bp          | Intron 5            |
| <i>OsNOX5</i>     | Forward: 5'-CCAGTGGGTGGGAAAAGTG-3'<br>Reverse: 5'-GTCCGATTGGCGGGTAAA-3'       | 247 bp          | Introns 9, 10       |
| <i>OsNOX6</i>     | Forward: 5'-CCTTCTCCATCACTTCAGCA-3'<br>Reverse: 5'-GGGCCATCTACAAGCAACC-3'     | 194 bp          | Intron 8            |
| <i>OsNOX7</i>     | Forward: 5'-GTCAAATGCTTATGCTGTCA-3'<br>Reverse: 5'-TGCCAGTCTCCGTTTGT-3'       | 223 bp          | Introns 7, 8        |
| <i>OsNOX8</i>     | Forward: 5'-GAGCGTGAGGCCAGTGAAGATA-3'<br>Reverse: 5'-AAGCTTGGGTGGTCATGGCG-3'  | 330 bp          | Introns 6, 7, 8     |
| <i>OsNOX9</i>     | Forward: 5'-TACTTCGGGCAGACACGGAT-3'<br>Reverse: 5'-GCGGGTTGCTGTCACTAAG-3'     | 151 bp          | /                   |
| <i>OsGAPDH1</i> * | Forward: 5'-GCAATCAAGGAGGAGGCTGA-3'<br>Reverse: 5'-ACGTGTCGCTCAAAGCAATG-3'    | 139 bp          | Introns 8, 9        |

\* *OsGAPDH1* (RAP-DB ID: Os02g0601300) was chosen as an internal control in rice; & UTRs, untranslated regions.
